# Supplementary material for: Removal of typical pollutant ciprofloxacin using iron–nitrogen co-doped modified corncob in the presence of hydrogen peroxide
Source: Royal Society of Chemistry journal article supplement (doi:10.1039/d3ra06437a), 2023-01-01
Supplement: d3ra06437a1.pdf [file d3ra06437a1.pdf]

1        **Removal of typical pollutant ciprofloxacin using iron-**  
2        **nitrogen co-doped modified corncob in the presence of**  
3                                **hydrogen peroxide**

4

5   **Yuankun Liu\***, Xinxia Zhang, Hongrun Liu

6   Municipal Engineering Department, College of Civil Engineering and Architecture,

7   Beijing University of Technology, Beijing 100124, P.R China

8

9   E-mails for all authors:

10   **Yuankun Liu**, liuyuankun@bjut.edu.cn

11   **Xinxia Zhang**, zhangxinxia1999@163.com

12   **Hongrun Liu**, liuhr@emails.bjut.edu.cn

13

14   **\*Corresponding author**

15   **Tel: +86-10-6739-1726; Fax: +86-10-6739-1726;**

16   **E-mail: liuyuankun@bjut.edu.cn (Y. Liu)**

17 **Supplementary data**

18 **Text S1.** Description of the reaction process

19 **Fig. S1.** The mass spectrum of intermediate products of CIP degradation at different  
20 time.

21 **Fig. S2.** Proposed degradation pathways of CIP in the homogeneous Fenton process.<sup>51,</sup>  
22 <sup>52</sup>

23 **Table S1.** BET surface area and pore size of BC and Fe-N-BC.

24

25 **Text S1.** Description of the reaction process

26       The variation of CIP removal with time in the whole system can be explained as  
27 follows: in the pre-reaction period, the high specific surface area of the catalyst and  
28 sufficient  $\cdot\text{OH}$  content endowed the system with strong adsorption and oxidation  
29 capacity. Therefore, the CIP removal rate of the system increased rapidly. In the late  
30 stage of the reaction, the active sites of the catalyst were covered, and the decrease of  
31 reactants and the increase of intermediate products led to the decrease of the reaction  
32 rate, and the degradation rate of CIP was gradually stabilized.

33

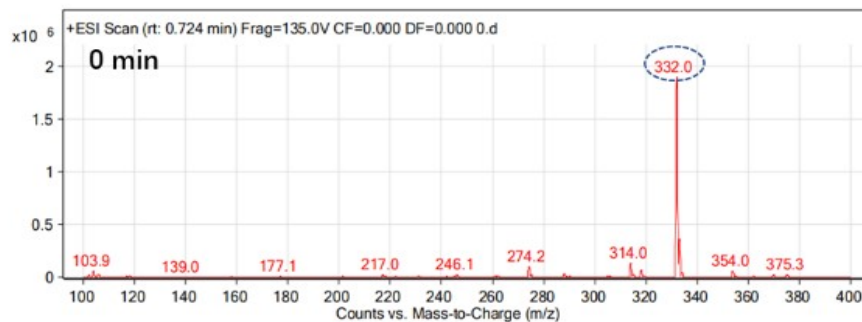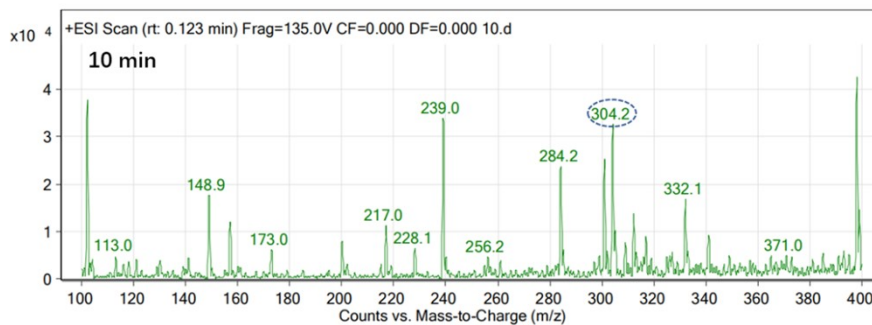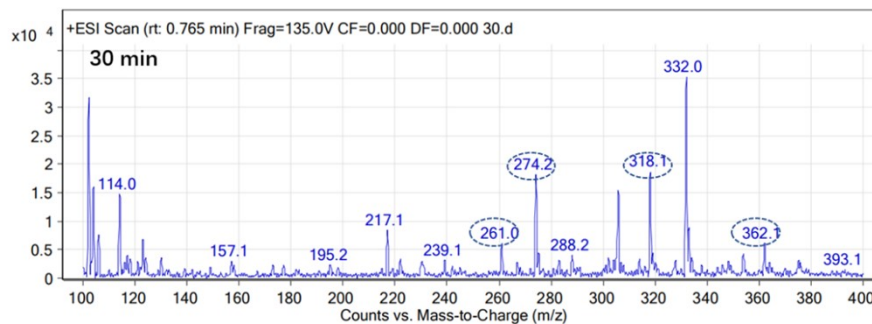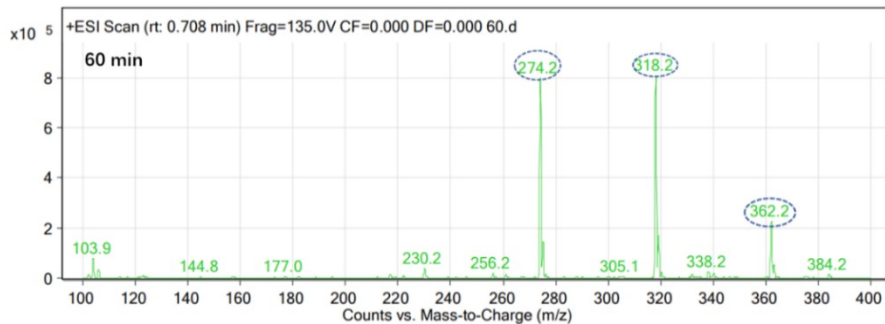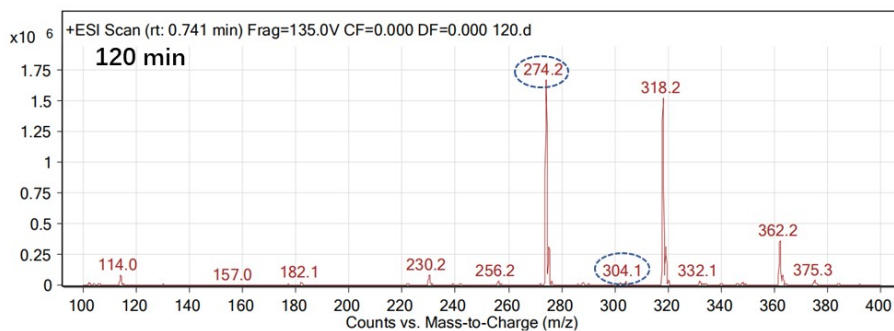

39 **Fig. S1.** The mass spectrum of intermediate products of CIP degradation at different time.

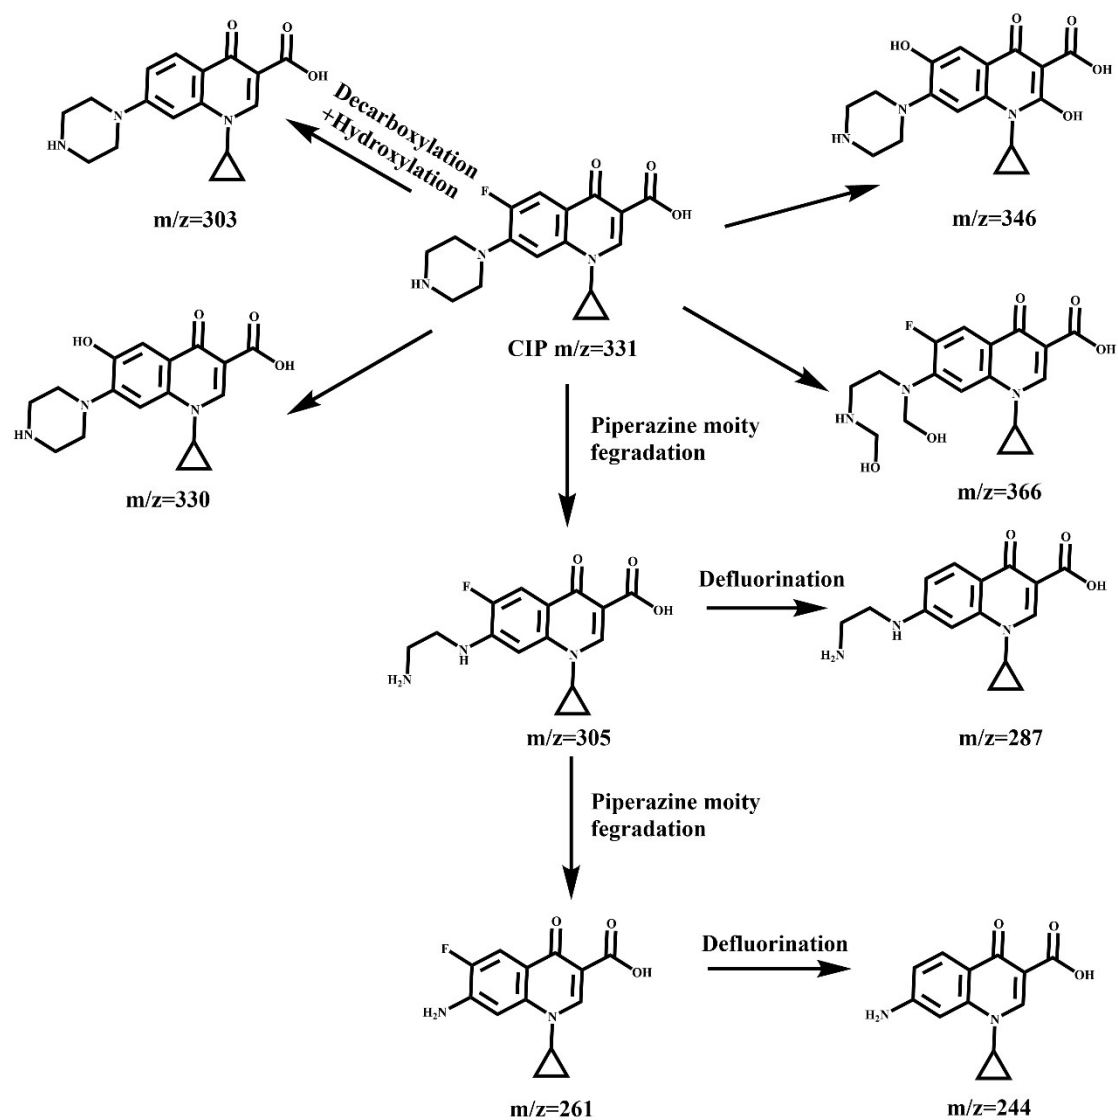

41

42

43

**Fig. S2.** Proposed degradation pathways of CIP in the homogeneous Fenton process.<sup>51, 52</sup>

44

**Table S1.** BET surface area and pore size of BC and Fe-N-BC.

| Samples | $S_{\text{BET}}(\text{m}^2 \cdot \text{g}^{-1})$ <sup>a</sup> | Pore diameter<br>(nm) <sup>b</sup> |
|---------|---------------------------------------------------------------|------------------------------------|
| BC      | 132.512                                                       | 1.583                              |
| Fe-N-BC | 261.772                                                       | 2.245                              |

45 <sup>a</sup> BET specific surface.

46 <sup>b</sup> The pore diameter is computed from the desorption branch of the isotherm using the BJH

47 method.

48
